1 **Title:** Virtual Home Visits Reduce Asthma Burden in Underserved Communities amidst the COVID-19  
2 Pandemic

3 **Keywords:** asthma, triggers, education, virtual home visits, environmental health

4 **Author Names & Affiliations:**

| Name                                                                                                                                     | Title                                        | Institutional Affiliation                                                             |
|------------------------------------------------------------------------------------------------------------------------------------------|----------------------------------------------|---------------------------------------------------------------------------------------|
| Arundhati Bakshi,<br>PhD ( <i>corresponding author</i> )                                                                                 | BREATHE Program<br>Manager                   | Section of Environmental Epidemiology &<br>Toxicology, Louisiana Department of Health |
| <b>Current title:</b> Data Analytics Program Manager<br><b>Current affiliation:</b> Immunization Program, Louisiana Department of Health |                                              |                                                                                       |
| Elora Apantaku,<br>MD                                                                                                                    | Preventive Medicine<br>Resident              | Section of Environmental Epidemiology &<br>Toxicology, Louisiana Department of Health |
| Tracy Marquette                                                                                                                          | Respiratory Therapist                        | Our Lady of the Lake Children’s Hospital                                              |
| Colette Jacob,<br>MPHTM                                                                                                                  | Indoor Air Quality<br>Coordinator            | Section of Environmental Epidemiology &<br>Toxicology, Louisiana Department of Health |
| S. Amanda Dumas,<br>MD, MSc                                                                                                              | Interim Chief Medical<br>Officer (Medicaid)  | Bureau of Health Services Financing<br>(Medicaid), Louisiana Department of Health     |
| Kate Friedman,<br>MNS                                                                                                                    | Environmental Health<br>Scientist Supervisor | Section of Environmental Epidemiology &<br>Toxicology, Louisiana Department of Health |
| Kathleen Aubin,<br>MSPH                                                                                                                  | Environmental Health<br>Scientist Manager    | Section of Environmental Epidemiology &<br>Toxicology, Louisiana Department of Health |
| Shannon Soileau,<br>MS                                                                                                                   | Section Chief                                | Section of Environmental Epidemiology &<br>Toxicology, Louisiana Department of Health |
| Shaun Kemmerly,<br>MD                                                                                                                    | Chief Medical Officer                        | Our Lady of the Lake Children’s Hospital                                              |

5 **Corresponding Author:**

6 Arundhati Bakshi, Ph.D. Louisiana Department of Health. 1450 Poydras St. #1908, New Orleans, LA-  
7 70112. Phone: 504-635-4313. Email: [Arundhati.Bakshi@la.gov](mailto:Arundhati.Bakshi@la.gov).

8 **Word Count:** 2917 (limit 3000; excluding abstract, summary box, references and tables)

9 **Number of tables and figures:** 5

10

11

12

13

14

15 **Abstract (250 words)**

16 *Objectives:* Pilot an asthma virtual home visits program, and evaluate its reach and ability to promote  
17 asthma self-management strategies in underserved communities.

18 *Methods:* Participants were continuously recruited into the 3-month-long program starting March 2021  
19 and provided with materials related to asthma education. Participants reporting poorly-controlled asthma  
20 and home-based triggers were also offered three virtual home visits with a respiratory therapist. All  
21 participants were asked to complete a pre- and post-intervention knowledge test and Asthma Control  
22 Test (ACT), and a final survey assessing perceptions regarding asthma management and environmental  
23 trigger reduction.

24 *Results:* As of October 2022, 147 participants were enrolled, and 51 had consented and received at least  
25 one virtual home visit. Approximately 77% of virtual visit recipients were children, 76% were non-  
26 Hispanic blacks, and 90% were from ‘extremely low’ or ‘low’ income families. Asthma symptoms  
27 improved across the whole group, with a median increase of 2.39 points on the ACT score. Knowledge  
28 tests revealed that 86% of participants learned about at least one new asthma trigger, with a larger  
29 fraction of virtual visit recipients (68% vs. 36% non-recipients) showing an improved score post-  
30 intervention. About 75% of participants reported feeling more empowered to take control of their  
31 asthma after participating in the program, and reported a significant improvement in their quality of life  
32 due to asthma.

33 *Conclusions:* The program successfully provided virtual asthma education to underserved, at-risk  
34 communities, and improved asthma outcomes for participants. Similar virtual models can be used to  
35 promote health equity, especially in areas with limited access to healthcare.

36

37 **Summary Box (85 words)**

- 38 • What is the current understanding on this subject?

39 Home-based interventions are known to be beneficial for improving asthma outcomes, especially among  
40 children; however, in-person visits have been a challenge during the COVID-19 pandemic.

- 41 • What does this report add to the literature?

42 This report suggests that virtual, home-based models for asthma education are a viable alternative to in-  
43 person visits. As such, they can be an important tool for promoting health equity, especially in areas  
44 with limited access to healthcare.

- 45 • What are the implications for public health practice?

46 Public health practitioners should be educated regarding the benefits of home-based asthma  
47 interventions, including virtual programs, as an adjuvant to standard clinical practices.

48

49

## 50 **Introduction**

51 Asthma is the most common chronic disease of childhood in the United States (US) and a common  
52 cause of hospitalization in children and adolescents.<sup>1</sup> It can cause lifelong disability and has both genetic  
53 and environmental risk factors.<sup>2</sup> Additionally, environmental triggers present in places where people  
54 with asthma spend most of their time can trigger exacerbations limiting meaningful activities and  
55 impairing quality of life (QOL). The US Environmental Protection Agency (EPA) estimates that  
56 Americans spend 90% of their time indoors<sup>3</sup>; thus the place where environmental triggers are most  
57 likely to worsen asthma symptoms is typically the patient's home. While traditional management of  
58 asthma focuses on appropriate medication use, this limits the amount of education patients receive about  
59 potential triggers in their own home.

60 Underserved communities face additional risk factors as lower quality homes have higher exposures of  
61 common household triggers. Asthma disproportionately affects children from low-income families<sup>2</sup>, and  
62 low-income families have been shown to live in homes with worse air quality, poor moisture control,  
63 and more allergens and dust.<sup>4</sup> Additionally, renters are more likely to be exposed to smoke and mold in  
64 their homes and are more likely to visit the Emergency Room (ER) or urgent care facilities for asthma  
65 symptoms than those who can afford to own their own homes.<sup>5</sup> Thus, discussion of clinical management  
66 at the doctor's office, while important, may miss important home and lifestyle modifications that can  
67 improve symptoms, especially within at-risk populations.

68 Home-based interventions that promote both clinical and environmental management of asthma have  
69 been shown to be beneficial.<sup>6,7</sup> However, in-person home visits can be costly, and have geographic  
70 limitations based on availability of care providers. This puts rural areas and other areas with limited  
71 healthcare access at a significant disadvantage. Moreover, during the COVID-19 pandemic, home visits  
72 also carried a new layer of risk for both patients as well as health care workers providing in-person care  
73 and education.

74 Having identified a need to improve asthma outcomes in underserved communities on the cusp of the  
75 pandemic<sup>8,9</sup>, the Louisiana Department of Health (LDH) attempted to address these issues collectively  
76 by piloting a virtual model for asthma home visits as part of their BREATHE program (Bringing  
77 Respiratory Health Equity for Asthmatics Through Healthier Environments). This Virtual Home Visits  
78 (VHV) program was intended to serve Louisiana residents with poorly-controlled asthma and significant  
79 home environmental concerns, with a three-fold objective of improving patients' asthma control,  
80 disseminating knowledge of environmental asthma triggers and empowering people to self-manage their  
81 asthma, such that the impact of asthma on their QOL would be reduced.

## 82 **Program Description**

83 The BREATHE VHV pilot program (**Figure 1**) was designed to bring asthma and Healthy Homes  
84 education to assist with asthma management in areas that have a high burden of asthma, COVID-19, and  
85 social and environmental vulnerability.<sup>10</sup> Louisiana residents interested in participating were identified  
86 through COVID-19 contact tracing, clinic referrals and direct community outreach. Interested  
87 individuals were screened for enrollment with questions that determined the level of asthma control and  
88 exposure to home environmental triggers (**Table 1A-B**), and the data stored in a custom REDCap data  
89 management system. Individuals who self-reported higher frequency of healthcare and medication usage

90 for asthma, and presence of at least one home environmental trigger were eligible for up to three VHV,  
91 one month apart. VHV were conducted on the telehealth platform, ANDOR, by a respiratory therapist  
92 (RT) at Our Lady of the Lake Children’s Hospital (LOLCH). All enrollees, regardless of VHV  
93 eligibility, were provided educational materials via postal or electronic mail, which included information  
94 about both the clinical and environmental management of asthma. All educational materials can be  
95 accessed on the LDH BREATHE website (<https://ldh.la.gov/page/BREATHE>). The first VHV discussed  
96 these materials with the patient, including asthma management tools and medication adherence, as well  
97 as simple home remedial tips, covering things such as mattress covers, vacuuming, and asthma friendly  
98 cleaning agents (**Supplement 1**). The remaining two visits were designed to receive updates on patients’  
99 asthma status and reinforce the lessons from the previous visits. After approximately three months,  
100 participants were administered a final survey (**Supplement 2**) measuring their attitudes and perceptions  
101 regarding asthma management and environmental trigger reduction. Participants were also asked to  
102 complete a pre- and post-intervention knowledge test (**Supplement 3**) and age-appropriate Asthma  
103 Control Tests (ACT; **Supplement 4**).<sup>11</sup> For child participants under age 18 years, a parent or guardian  
104 completed all surveys, except questions on the pediatric ACT that required the child to answer them.  
105 These data were then analyzed to test the efficacy of the pilot program.

106 [insert Figure 1]

107 **Figure 1: BREATHE Program Design.** All interested patients were enrolled via phone or an online  
108 interest form ([www.ldh.la.gov/breathe-enroll](http://www.ldh.la.gov/breathe-enroll)). Based on the clinical and environmental pre-screening  
109 information they provided, patients were offered three virtual home visits by a RT. After three months,  
110 participants were evaluated on their asthma status as well as attitudes and perceptions towards asthma  
111 management after participation in the program.

112

### 113 **Evaluation Purpose and Criteria**

114 The program evaluation was designed to assess four focus areas:

- 115 1. Reach into underserved areas; measured by demographic characteristics of VHV recipients. The  
116 VHV aimed to serve blacks, children, and low-income patients residing in previously identified areas of  
117 concern<sup>9</sup>, namely East Baton Rouge (EBR), Caddo, Jefferson, and Orleans Parishes (counties), the latter  
118 two together comprising the Greater New Orleans (GNO) Area.
- 119 2. Asthma symptom control; measured by pre- vs. post-intervention ACT scores. Success was  
120 defined as final ACT scores being higher than initial ones, with at least 50% patients showing  
121 improvement. We hypothesized that patients who received the VHV would show a greater improvement  
122 than those who did not.
- 123 3. Knowledge about environmental trigger management; measured by pre- vs. post-intervention  
124 knowledge test scores. Success was defined as at least 50% patients learning about a minimum of one  
125 environmental asthma trigger and improving their post-test score. We hypothesized that patients who  
126 received the VHV would show a greater improvement in their knowledge of environmental trigger  
127 reduction than those who did not.
- 128 4. Attitudes and perceptions about asthma self-management and impact of asthma on quality of life;  
129 gauged using a post-intervention survey asking about their perceptions regarding asthma symptoms,

130 asthma education, environmental trigger reduction and sense of empowerment regarding asthma self-  
131 management after participation in the program. Success was defined as at least 50% patients feeling  
132 more educated about asthma triggers, more empowered to self-manage their asthma, and having fewer  
133 symptoms and home environmental triggers. We hypothesized that, these factors taken together, would  
134 minimize the impact of asthma on patients' QOL.

## 135 **Methods**

### 136 Program reach in underserved areas

137 Considering the possibility that our target population may not have access to high-speed internet, we  
138 measured the reach of the VHV program by asking a series of demographic- and housing-related  
139 questions during the first VHV. This included questions about the age of the participant, sex, race,  
140 homeownership status (homeowner or renter), level of income, and area of residence, among others. The  
141 full list of questions is available in **Supplement 1**.

### 142 Asthma symptom control

143 The first and last ACT scores were compared for patients in order to assess potential improvements in  
144 asthma control after participating in the BREATHE program. Initial and final scores (separated by  
145 approximately three months) were summarized for all patients who completed either test (unpaired  
146 comparison), as well as those who completed both (paired comparison), and testing using Mann-  
147 Whitney U-test. The 58 patients who completed both the initial and final ACT were also stratified by the  
148 number of VHV they had received (none, at least one, or all three) to test whether patients receiving the  
149 virtual visits experienced greater improvement in asthma control. Of note, in all data analyses, the 'no  
150 VHV' category included patients who did not qualify based on the pre-screening criteria as well as those  
151 who qualified but did not consent to receiving it. Non-parametric statistical tests were used to analyses  
152 data with non-normal distribution, as confirmed using the Shapiro-Wilk and Anderson-Darling tests.

### 153 Environmental trigger education

154 Along with descriptive statistics, the percent patients who learned about at least one new asthma trigger  
155 after participating in the program was calculated. This was determined by tallying the number of patients  
156 who answered at least one question correctly in the post-test but not in the pre-test. Any increase in the  
157 post-test score (compared to the same person's pre-test score) was also analyzed to identify the percent  
158 patients who showed overall greater knowledge of environmental asthma triggers. Patients showing  
159 improvements were then stratified by VHV status and compared using Fisher's exact test to identify  
160 potential impact of VHV on knowledge gain.

### 161 Patient attitudes and perceptions

162 Attitudes and perceptions regarding patients' ability to self-manage asthma, following participation in  
163 the program, was assessed through a series of questions (listed below). Participants' sense of  
164 empowerment to self-manage asthma after participating in the program was gauged based on their  
165 response to the question, "After participation in the program, do you feel more empowered to take  
166 control of your (or your child's) asthma?" Answers ranged from 'not at all' (score=1) to 'a lot'  
167 (score=5), and a score of 3 or higher was considered a positive outcome. Perceptions regarding potential



168 symptom reduction was measured based on responses to the question, “Since you participated in the  
169 program, how often have you (or your child) had asthma symptoms like coughing, wheezing or needing  
170 to use an inhaler?” Response options were ‘more often’, ‘less often’, ‘about the same’ and ‘none at all’.  
171 Of these, ‘less often’ and ‘none at all’ were considered positive outcomes. To understand participants’  
172 beliefs about environmental trigger reduction, we asked a true or false question: “Since participating in  
173 this program, I believe there are fewer asthma triggers in the home resulting from cleaning practices,  
174 pest control practices, smoking, etc.” Separately, we also asked patients about the specific  
175 environmental trigger reduction strategies they implemented. Patients’ perceptions about their level of  
176 education regarding asthma triggers was checked using the question: “How much did you learn about  
177 environmental asthma triggers by participating in this program?” Answers ranged from ‘not at all’  
178 (score=1) to ‘a lot’ (score=5), and a score of 3 or higher was considered a positive outcome. Finally,  
179 participants were asked to score the impact that asthma has had on their QOL over the prior two weeks,  
180 first at enrollment, and again at the end of the program. Responses ranged from ‘none at all’ (score=1) to  
181 ‘a lot’ (score=5), and a score of 3 or lower was considered a positive outcome. The overall shift of  
182 percent clients experiencing the positive outcome (i.e., ‘none’, ‘not much’, or ‘a little’ impact) at the end  
183 of the intervention period, as compared to ‘quite a bit’ or ‘a lot’ in the beginning of the program, was  
184 tested using Fisher’s exact test. Each question was analyzed separately for this set of analyses, and the  
185 denominator consisted of the total number of patients who responded to the particular question.  
186 Stratification by VHV status was not possible for this analysis due to very few respondents in the “no  
187 VHV” group.

## 188 **Results**

### 189 Clinical, environmental and demographic characteristics of patients

190 Between March 2021-October 2022, 395 patients were referred, and 147 (37%) of them completed the  
191 enrollment requirements for the program. Of these, 112 (76%) qualified for the VHV, 51 of whom  
192 (45%) had consented and received at least one virtual visit as of October 2022. A majority of the 147  
193 enrollees suffered from allergies (80%) and used a rescue inhaler 2 or more times in a typical week  
194 (69%) (**Table 1A**). The most notable environmental characteristic present in homes was the use of  
195 strongly-scented cleaning agents and/or perfumed products (80%). Nearly half (47%) also had moderate  
196 or severe dust build-up in their homes (**Table 1B**). About 61% of enrollees were from the three  
197 previously identified areas of concern: 25% and 23% from EBR and Caddo Parishes respectively, and  
198 13% from the GNO Area. Based on detailed patient demographics, the visits primarily served non-  
199 Hispanic blacks (76%), children (77%), renters (62%) and low-income families (90%) (**Table 1C**). In  
200 terms of location, nearly half of VHV recipients (n=22/50; 44%) were from EBR Parish.

201

**Table 1. Asthma-related clinical and environmental characteristics of all BREATHE patients and demographic characteristics of VHV recipients.**

| <b>A) Clinical Characteristics of ALL participants:</b>                                                      | <b>% All</b> |
|--------------------------------------------------------------------------------------------------------------|--------------|
| used rescue inhaler $\geq 2$ times in a typical week ( <i>score=1</i> )                                      | 69%          |
| woke at night $\geq 2$ times in a typical week with asthma symptoms or cough ( <i>score=1</i> )              | 59%          |
| filled their rescue medicine $\geq 2$ times in a year ( <i>score=1</i> )                                     | 61%          |
| visited the ER $\geq 2$ times and/or were hospitalized $\geq 1$ time in the last 6 months ( <i>score=2</i> ) | 40%          |
| suffer from allergies ( <i>score=1</i> )                                                                     | 80%          |
| <b>B) Home Environmental Characteristics of ALL participants:</b>                                            | <b>% All</b> |
| had moderate or heavy dust build-up in their home ( <i>score=1 for moderate; 2 for heavy</i> )               | 47%          |
| had seen mold, smelled musty odors or experienced water leaks ( <i>score=1</i> )                             | 27%          |
| had problems with pests in the last 3 months ( <i>score=2</i> )                                              | 30%          |
| had someone who smoked in the home in the past 7 days ( <i>score=2</i> )                                     | 9%           |
| had gas cooktop ( <i>score=1</i> )                                                                           | 31%          |
| did not use an exhaust fan or open a window when cooking on the stove ( <i>score=1</i> )                     | 27%          |
| have furry or feathered pets in the home ( <i>score=1</i> )                                                  | 41%          |
| used cleaning agents or perfumed products that have a strong odor ( <i>score=1</i> )                         | 79%          |
| <b>C) Demographic Characteristics of VHV recipients:</b>                                                     | <b>% VHV</b> |
| Age group: Children (0-17 years of age)                                                                      | 77%          |
| Age group: Adults (18-64 years of age)                                                                       | 21%          |
| Age group: Older adults (65+ years of age)                                                                   | 2%           |
| Sex: Female                                                                                                  | 56%          |
| Race: Black                                                                                                  | 76%          |
| Race: White                                                                                                  | 24%          |
| Homeownership: Renters                                                                                       | 62%          |
| Income level: Extreme low (<30% AMI)                                                                         | 41%          |
| Income level: Low (<50% of AMI)                                                                              | 49%          |
| Income Level: Moderate (<80% AMI)                                                                            | 10%          |
| Top county (parish) of residence: East Baton Rouge                                                           | 44%          |

ER = Emergency Room

VHV = Virtual Home Visit

AMI = Annual Median Income (US Housing and Urban Development). Designations based on AMI for a family of four (average family size of participants) in East Baton Rouge Metropolitan area (where majority of participants resided).

202

203 Asthma symptom control

204 Based on pre- vs. post-intervention ACT scores, asthma symptoms improved across all enrollees who  
 205 completed either the initial and/or the final ACT, with a median increase of 2.39 points on the ACT  
 206 ( $P=0.0102$ ; **Table 2A**). Similar results were observed among the 58 participants who completed both the  
 207 initial and final ACT with 62% patients showing improvement ( $P=0.0114$ ; **Table 2B**). When stratified  
 208 by virtual visit status, improvements in average and median ACT scores was observed for all groups;  
 209 however, only patients who received all three VHV experienced statistically significant improvements  
 210 ( $P=0.00634$ ;  $n=25$ . Of note, 50% patients in both VHV groups started with an ACT score <19  
 211 (considered not well-controlled asthma) and ended with an ACT score >19, which is considered well-  
 212 controlled asthma (**Table 2C**).

**Table 2. Comparison of pre- and post-intervention Asthma Control Test (ACT) scores among BREATHE patients.**

| <b>A) All ACT scores:</b>                                 |                |              |               |                            |          |                            |
|-----------------------------------------------------------|----------------|--------------|---------------|----------------------------|----------|----------------------------|
|                                                           | <b>Initial</b> | <b>Final</b> | <b>Change</b> | <b>P-value<sup>a</sup></b> |          |                            |
| Average                                                   | 17.45          | 19.37        | +2.24         | 0.0102                     |          |                            |
| Standard deviation                                        | 4.75           | 4.80         |               |                            |          |                            |
| Median                                                    | 17.50          | 20.00        | +2.39         |                            |          |                            |
| N                                                         | 86             | 62           |               |                            |          |                            |
| <b>B) Paired ACT scores:</b>                              |                |              |               |                            |          |                            |
|                                                           | <b>Initial</b> | <b>Final</b> | <b>Change</b> | <b>P-value<sup>a</sup></b> |          |                            |
| Average                                                   | 17.33          | 19.57        | +2.24         | 0.0114                     |          |                            |
| Standard deviation                                        | 5.05           | 4.71         |               |                            |          |                            |
| Median                                                    | 18.00          | 20.50        | +2.39         |                            |          |                            |
| N                                                         | 58             | 58           | 62% improved  |                            |          |                            |
| <b>C) Median ACT scores by Virtual Home Visit status:</b> |                |              |               |                            |          |                            |
|                                                           | <b>Initial</b> | <b>Final</b> | <b>Change</b> | <b>% improved</b>          | <b>N</b> | <b>P-value<sup>a</sup></b> |
| At least 1 VHV                                            | 18.00          | 21.30        | +2.00         | 64%                        | 33       | 0.0524                     |
| All 3 VHV                                                 | 18.00          | 21.30        | +3.00         | 76%                        | 25       | 0.0063                     |
| No VHV                                                    | 15.00          | 19.00        | +4.00         | 60%                        | 25       | 0.0643                     |

<sup>a</sup> P-value derived from Mann-Whitney U-test

N = number of patients who completed the survey

VHV = Virtual Home Visit

213

214 Knowledge of environmental trigger management

215 There was no difference in the median knowledge test scores for the 50 enrollees who completed both  
216 instruments (83% [pre] vs. 88% [post]). However, slightly higher percent respondents scored in the 90-  
217 100% range on the post-intervention knowledge test (30% [pre] vs. 42% [post]). Of note, patients also  
218 showed greater awareness regarding the subtleties of environmental trigger reduction during the post-  
219 test, which suggested a deeper understanding of the subject material. For instance, on the true/false  
220 question about an open bathroom window removing moisture from the air, many patients considered the  
221 impact of indoor vs. outdoor humidity only during the post-test.

222 Comparing pre/post scores for each individual revealed that 86% of all respondents (n=43/50) learned  
223 about at least one new asthma trigger (**Figure 2A**). There was no difference when stratified by VHV  
224 status; 88% respondents (n=22/25) who received VHV learned about at least one new environmental  
225 trigger compared to 84% respondents (n=21/25) who did not (**Figure 2B**). About 52% respondents  
226 (n=26/50) had a higher post-intervention test score compared to their pre-test score (**Figure 2C**). Here,  
227 there was a significant difference by VHV status (P=0.0465; Fisher's exact test); 68% VHV recipients  
228 (n=17/25) showed an improved post-test score, compared to 36% of non-recipients (n=9/25) (**Figure**  
229 **2D**). This is consistent with the higher mode observed in the post-test scores of VHV recipients (88%  
230 [pre] vs. 96% [post]). Such increase was not observed for the 'no VHV' group whose mode remained at  
231 92% both for the pre- and post-tests.

232 [insert Figure 2]



233 **Figure 2: Knowledge gain among BREATHE participants.** Percent respondents who learned about at  
234 least one new environmental trigger – overall (A) and stratified by VHV status (B). Percent respondents  
235 with improved post-intervention knowledge test score – overall (C) and by VHV status (D).

236

237 Attitudes and perceptions about asthma self-management and impact of asthma on QOL

238 A majority of respondents reported having fewer symptoms (n=35/48; 73%) since participating in the  
239 program, and feeling more empowered (n=37/49; 75%) and educated (n=47/51; 94%) about self-  
240 managing their asthma (Figure 3A). About 82% respondents also believed there to be fewer asthma  
241 triggers in the home (n=37/45), and reported implementing changes such as cleaning more frequently,  
242 using asthma-friendly cleaners, avoiding bleach, and ventilating the kitchen when cooking. At the end of  
243 the intervention period, there was also a statistically significant shift towards reduced impact from  
244 asthma on QOL (Figure 3B). During enrollment, 33% of 106 total respondents reported the impact of  
245 asthma on their QOL being ‘a lot’. This number had reduced to 13% in the final survey, with 47 total  
246 respondents. Conversely, percent participants who reported ‘no’ impact of asthma on QOL rose from  
247 16% during enrollment to 49% during the final survey.

248 [insert Figure 3]

249 **Figure 3: Perceptions regarding asthma self-management (A) and impact of asthma on quality of**  
250 **life (B).**

251

## 252 **Lessons Learned**

253 Lessons learned from the BREATHE VHV pilot can be summarized as follows:

- 254 1. Virtual visits can reach underserved, at-risk communities, and yield improvements in asthma  
255 symptoms. Thus, they can be a viable alternative to in-person home visits for asthma and  
256 Healthy Homes education.
- 257 2. However, a better understanding is needed of the barriers faced by patients who qualified for  
258 VHV but did not consent to receiving them. If the barriers are related to technology, then  
259 partnering with internet-capable community centers may be helpful.
- 260 3. While all patients showed improvements, those receiving VHV showed greater improvements in  
261 knowledge of environmental trigger reduction. This suggests that additional time spent  
262 discussing the material with a trained asthma educator may be helpful for improving retention.
- 263 4. Further, if patients’ symptoms are severe, additional effort should be made to complete more  
264 than one VHV, as they may need more follow-up than patients whose asthma is more easily  
265 managed.
- 266 5. Expanding partnerships (especially with clinics and hospitals) to maximize enrollment, regular  
267 follow-ups to prevent attrition and allowing patients to access the surveys in multiple ways  
268 (phone, email and/or text) can improve participation. Providing patients with additional, value-  
269 added wrap-around services may also improve retention.
- 270 6. The most common change reported by VHV recipients was change of cleaning agents. This was  
271 also the topic that patients showed most improvement on in the knowledge test. If the changes

272 implemented as a result of knowledge gain played a role in improving their symptoms, such low-  
273 cost housekeeping modifications could be further promoted by providing patients with “green-  
274 cleaning” supplies.<sup>12,13</sup>  
275 7. Preliminary data (not shown) also suggest potential reduction in emergency and urgent care  
276 utilization for asthma exacerbations among participants. This suggests that virtual models of  
277 asthma education can be a useful tool for promoting health equity, especially in areas where (and  
278 times when) access to in-person home visits may be limited.

## 279 **References**

- 280 1. Gasana J, Ibrahimou B, Albatineh AN, Al-Zoughool M, Zein D. Exposures in the Indoor  
281 Environment and Prevalence of Allergic Conditions in the United States of America. *Int J Environ Res*  
282 *Public Health*. 2021;18(9):4945.
- 283 2. Toskala E, Kennedy DW. Asthma risk factors. *Int Forum Allergy Rhinol*. 2015;5 Suppl 1(Suppl  
284 1):S11-S16.
- 285 3. U.S. Environmental Protection Agency. 1989. Report to Congress on indoor air quality: Volume 2.  
286 EPA/400/1-89/001C. Washington, DC.
- 287 4. Pacheco CM, Ciaccio CE, Nazir N, et al. Homes of low-income minority families with asthmatic  
288 children have increased condition issues. *Allergy Asthma Proc*. 2014;35(6):467-474.
- 289 5. Ganesh B, Scally CP, Skopec L, & Zhu J. The Relationship between Housing and Asthma among  
290 School-Age Children: Analysis of the 2015 American Housing Survey.  
291 [https://www.urban.org/sites/default/files/publication/93881/the-relationships-between-housing-and-](https://www.urban.org/sites/default/files/publication/93881/the-relationships-between-housing-and-asthma_1.pdf)  
292 [asthma\\_1.pdf](https://www.urban.org/sites/default/files/publication/93881/the-relationships-between-housing-and-asthma_1.pdf). Published October 2017. Accessed October 15, 2022.
- 293 6. Marshall ET, Guo J, Flood E, Sandel MT, Sadof MD, Zotter JM. Home Visits for Children With  
294 Asthma Reduce Medicaid Costs. *Prev Chronic Dis*. 2020;17:E11.
- 295 7. National Center for Healthy Housing. Case Studies: The Benefits of Home Visits for Children with  
296 Asthma. [https://nchh.org/resource-library/case-studies\\_the-benefits-of-home-visits-for-children-with-](https://nchh.org/resource-library/case-studies_the-benefits-of-home-visits-for-children-with-asthma.pdf)  
297 [asthma.pdf](https://nchh.org/resource-library/case-studies_the-benefits-of-home-visits-for-children-with-asthma.pdf). Published July 2014. Accessed June 20, 2022.
- 298 8. Bakshi A, Reilly A, Ramson M, Stewart C, Soileau S, and Friedman K. Childhood Asthma in East  
299 Baton Rouge Parish, 2010-2015. [https://ldh.la.gov/assets/oph/Center-](https://ldh.la.gov/assets/oph/Center-EH/envepi/Reports/LMRSEETmar2019b.pdf)  
300 [EH/envepi/Reports/LMRSEETmar2019b.pdf](https://ldh.la.gov/assets/oph/Center-EH/envepi/Reports/LMRSEETmar2019b.pdf). Published Mar 2019. Accessed June 20, 2022.
- 301 9. Bakshi A, Van Doren A, Maser C, Aubin K, Stewart C, Soileau S, Friedman K, and Williams A.  
302 Identifying Louisiana communities at the crossroads of environmental and social vulnerability, COVID-  
303 19, and asthma. *PLoS One*. 2022;17:e0264336.
- 304 10. Bakshi A. Implementation and Management of Virtual Home Visits for Asthma Management,  
305 Version 3. [https://ldh.la.gov/assets/oph/Center-EH/drywall/SOP\\_Virtual\\_Home\\_Visits\\_v3\\_FINAL.pdf](https://ldh.la.gov/assets/oph/Center-EH/drywall/SOP_Virtual_Home_Visits_v3_FINAL.pdf).  
306 Published Feb 2022. Accessed June 20, 2022.
- 307 11. Schatz M, Sorkness CA, Li JT, et al. Asthma Control Test: reliability, validity, and responsiveness in  
308 patients not previously followed by asthma specialists. *J Allergy Clin Immunol*. 2006;117(3):549-556.

- 309 12. Rutsch L. EPA's Safer Choice for Green Cleaning in Schools.  
310 <https://greenschoolsnationalnetwork.org/epas-safer-choice-green-cleaning-schools/>. Published  
311 November 10, 2016. Accessed October 15, 2022.
- 312 13. Shrem D, Weinberg J, Flattery J. Healthy Cleaning & Asthma-Safer Schools: A How-To-Guide.  
313 [https://www.cdph.ca.gov/Programs/CCDPHP/DEODC/OHB/WRAPP/CDPH%20Document%20Library](https://www.cdph.ca.gov/Programs/CCDPHP/DEODC/OHB/WRAPP/CDPH%20Document%20Library/CLASSguidelines.pdf)  
314 [/CLASSguidelines.pdf](https://www.cdph.ca.gov/Programs/CCDPHP/DEODC/OHB/WRAPP/CDPH%20Document%20Library/CLASSguidelines.pdf). Published October 2014. Accessed October 15, 2022.

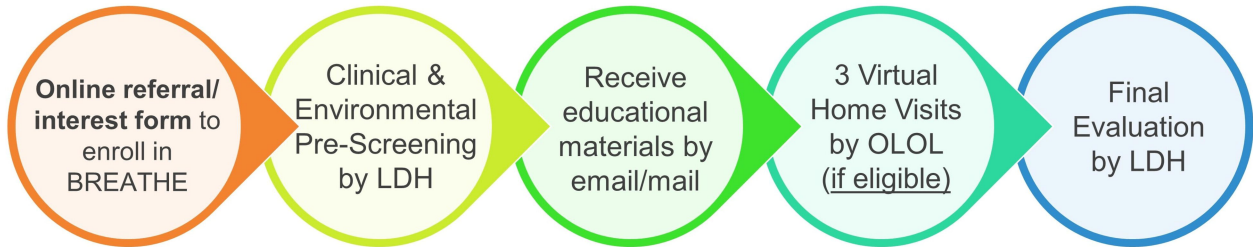

Participants *not eligible* for virtual visits get:

- Two Asthma Control Tests (3 months apart)
- One phone check-in with LDH (at ~3-4 weeks)

**A)**

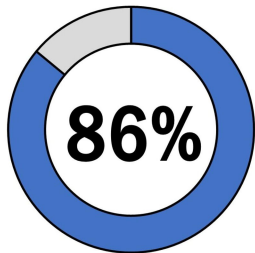

**B)**

**Rec'd VHV**

**88%**

**No VHV**

**84%**

**C)**

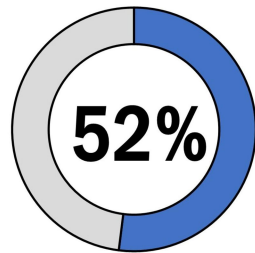

**D)**

**68%**

**36%**

**P=0.0465**

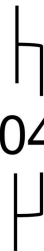



**A)**

% respondents

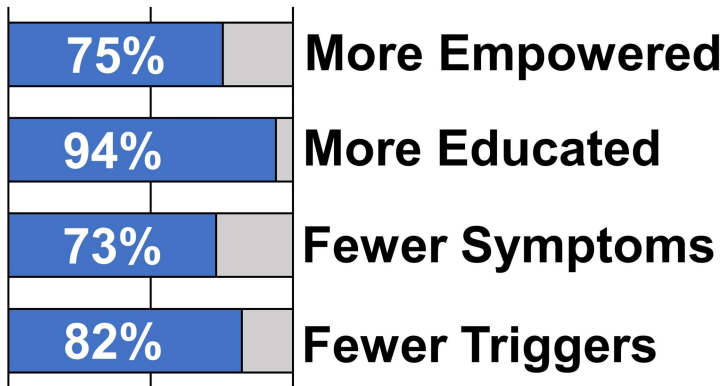**B)** $P=0.0015$ 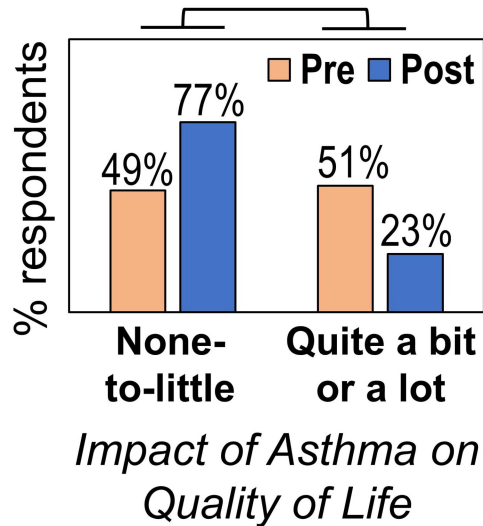

Source: https://www.medrxiv.org/content/10.1101/2022.11.05.22281903v1.full.pdf
